# Supplementary material
Source: PubMed Central journal article supplement (PMC2409010)

# Supplementary Fig 1

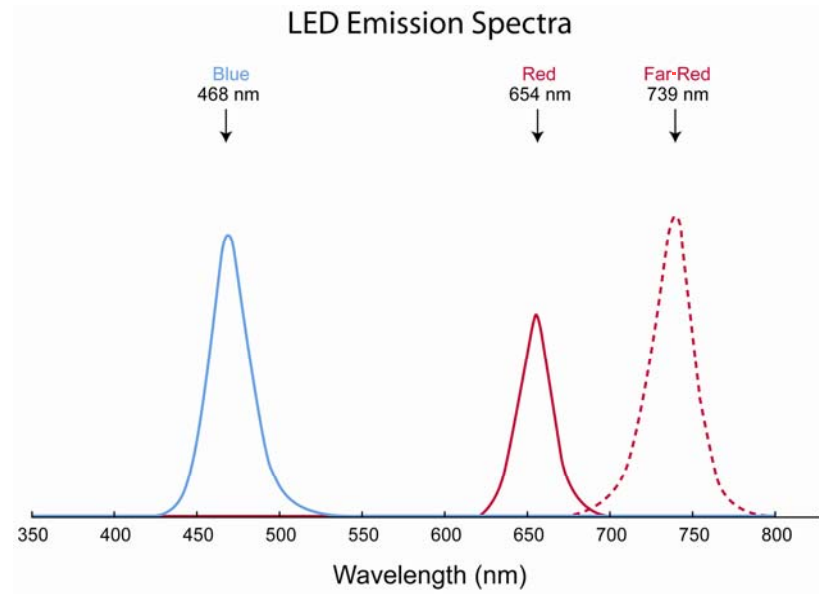

**Supplementary Figure 1.** Spectra of blue, red and far-red LED lights

Supplement: pp.107.115469_1.pdf [file pp.107.115469_1.pdf]
